# Supplementary material
Source: publisher figshare collection journal article supplement (https://acs.figshare.com/ndownloader/files/4711036)
Supplement: Supplementary file 1 [file 4711036]

# SUPPLEMENTARY INFORMATION

## Structural Characterization of Flexible Proteins Using Small-Angle X-ray Scattering

**Pau Bernadó, Efstratios Mylonas, Maxim V. Petoukhov, Martin Blackledge and  
Dmitri I. Svergun**

**FIGURE S1.**

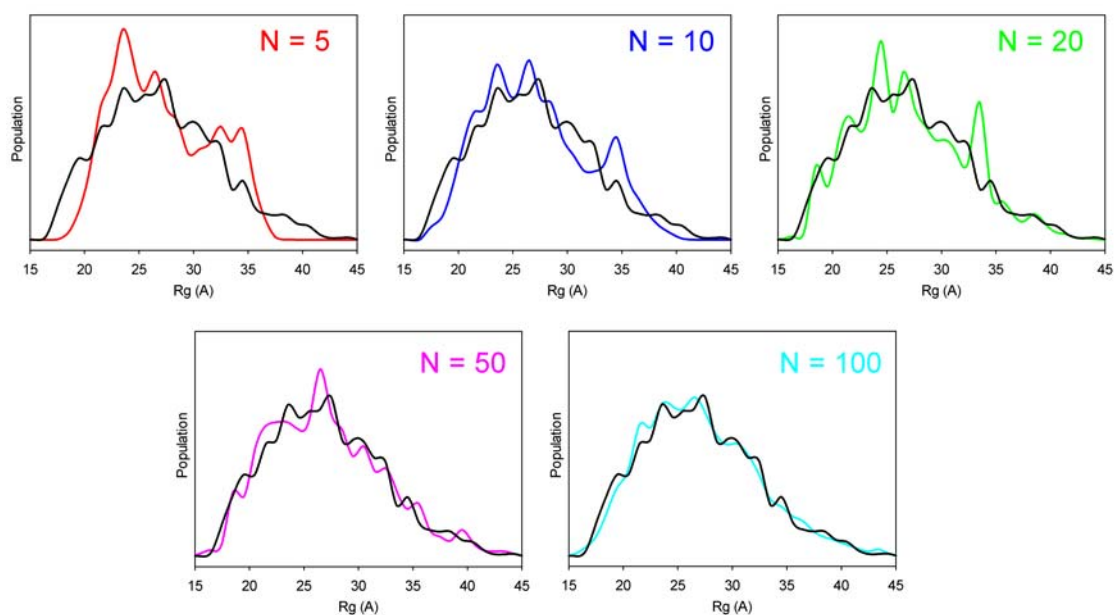

**Figure S1.** Effect of the size of the chromosomes on the performance of the EOM for the polyaniline free chain test-case (*control*).  $R_g$  distribution for chromosomes with  $N$  values of 5 (red), 10 (blue), 20 (green), 50 (pink) and 100 (cyan), compared with the one derived from a 1,000 structures of the polyaniline chain without restrictions, *control* , (black).

**FIGURE S2.**

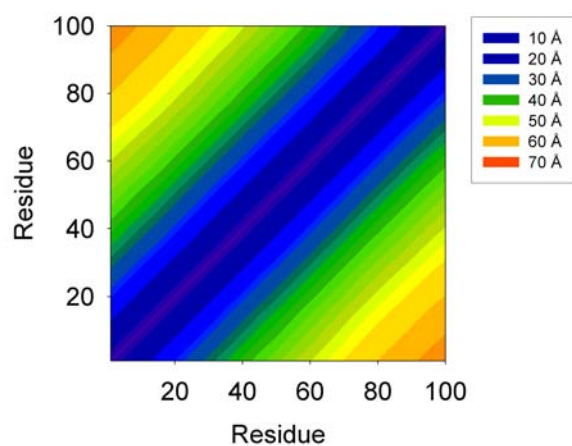

**Figure S2.** Average  $C_\alpha - C_\alpha$  distance matrix for the pool of 10,000 structures of the polyaniline chain. The color scale goes from less than 10 Å (purple) to 70 Å in red.

**FIGURE S3**

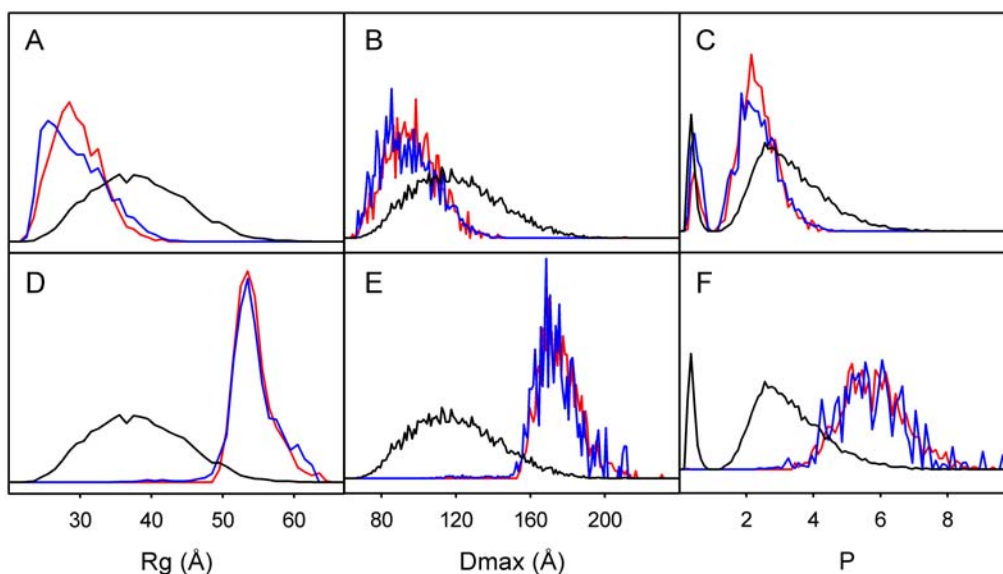

**Figure S3.** Size and shape descriptor distributions obtained from the analysis of the optimized ensemble of scattering profiles calculated for polyubiquitin chains with restricted conformational sampling. (A-C) polyubiquitin chain with a contact ( $< 30$  Å) between the centers of mass of the first and the third ubiquitin domains of the chain (*symmetric compact*). (D-F) restricted polyubiquitin chain forcing the centers of mass of the first and the fourth ubiquitin domains to be separated by more than 130 Å (*symmetric extended*). Distributions from the pool, the simulated and the fitted ensembles are shown in black, red and blue, respectively.

**FIGURE S4**

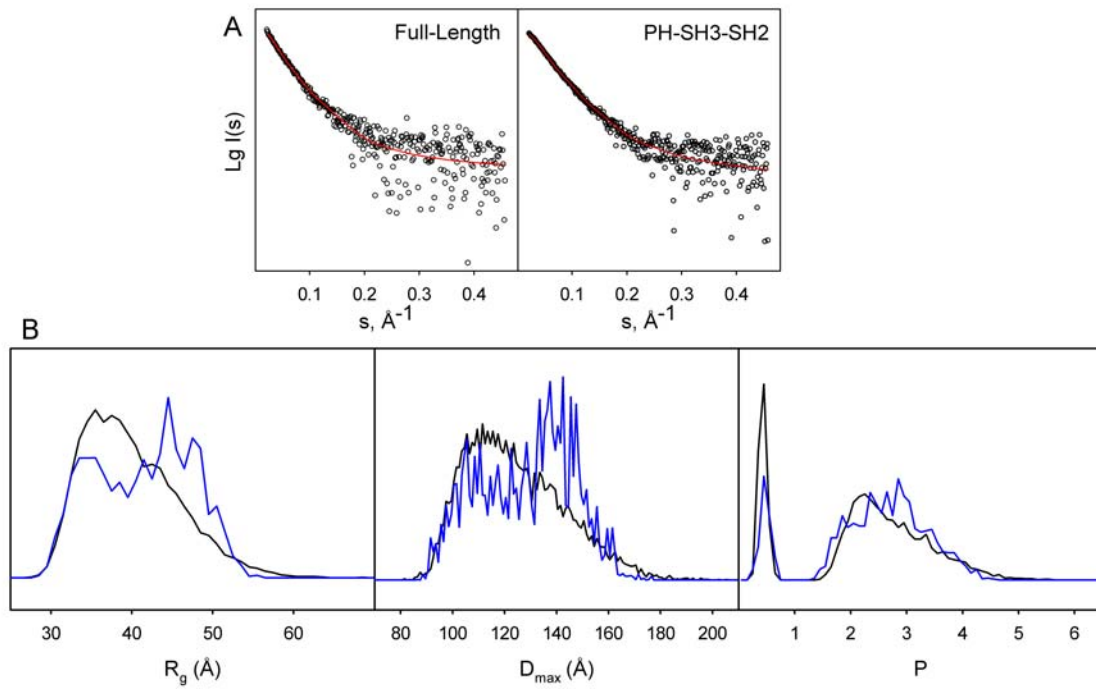

**Figure S4.** Application of the EOM to BTK. (A) Experimental data (black) and the multiple curve fitting (red) performed with the EOM for both used constructs. (B) Size and shape descriptor distributions ( $R_g$ ,  $D_{\text{max}}$ , and  $P$ ) derived from the ensemble of structures the simultaneously fitted the BTK scattering profiles (Full-Length and PH-SH3-SH2 constructs; black: pool, blue: EOM subset).
